# Supplementary material for: Mindfulness-Based and Mindfulness-Informed Interventions at the Workplace: A Systematic Review and Meta-Regression Analysis of RCTs
Source: PubMed Central journal article supplement (PMC10172073; doi:10.1007/s12671-023-02130-7), 2023-05-11
Supplement: 12671_2023_2130_MOESM5_ESM.pdf [file 12671_2023_2130_MOESM5_ESM.pdf]

| Authors                                     | Randomization process | Deviations from intended interventions | Missing outcome data | Measurement of the outcome | Selection of the reported result | Overall |
|---------------------------------------------|-----------------------|----------------------------------------|----------------------|----------------------------|----------------------------------|---------|
| Aikens et al. 2014                          | ?                     | -                                      | +                    | -                          | ?                                | -       |
| Alexander et al. 2015                       | ?                     | -                                      | -                    | -                          | ?                                | -       |
| Allexandre et al. 2016                      | ?                     | -                                      | +                    | -                          | ?                                | -       |
| Amutio et al. 2015a; Amutio et al. 2015b    | ?                     | -                                      | -                    | -                          | -                                | -       |
| Arredondo et al. 2017                       | ?                     | -                                      | ?                    | -                          | ?                                | -       |
| Baby et al. 2019                            | +                     | ?                                      | -                    | +                          | +                                | -       |
| Baccarani et al. 2013                       | ?                     | -                                      | +                    | -                          | ?                                | -       |
| Bartlett et al. 2017                        | -                     | -                                      | -                    | -                          | ?                                | -       |
| Bhandari et al. 2010                        | ?                     | -                                      | +                    | -                          | ?                                | -       |
| Bhandari 2017                               | ?                     | -                                      | +                    | -                          | ?                                | -       |
| Bostock et al. 2019                         | ?                     | ?                                      | +                    | -                          | ?                                | -       |
| Brinkborg et al. 2011                       | ?                     | -                                      | +                    | -                          | ?                                | -       |
| Calder Calisi 2017                          | ?                     | -                                      | -                    | -                          | ?                                | -       |
| Cheema et al. 2013                          | +                     | +                                      | +                    | +                          | +                                | +       |
| Chin et al. 2019; Slutsky et al. 2019       | ?                     | ?                                      | -                    | -                          | -                                | -       |
| Christopher et al. 2018                     | ?                     | -                                      | -                    | -                          | ?                                | -       |
| Coelhoso et al. 2019                        | ?                     | ?                                      | -                    | -                          | -                                | -       |
| Cook et al. 2017a                           | ?                     | -                                      | -                    | -                          | ?                                | -       |
| Crain et al. 2017                           | ?                     | -                                      | -                    | -                          | ?                                | -       |
| Dahl 2019; Dahl and Dlugosch 2020           | ?                     | -                                      | -                    | -                          | -                                | -       |
| Duchemin et al. 2015; Steinberg et al. 2016 | ?                     | -                                      | +                    | -                          | -                                | -       |
| Dwivedi et al. 2015; Dwivedi et al. 2016a   | +                     | +                                      | +                    | +                          | -                                | -       |
| Elder et al. 2014                           | +                     | -                                      | -                    | -                          | ?                                | -       |
| Fang and Li 2015                            | ?                     | -                                      | -                    | -                          | ?                                | -       |

|                                            |   |   |   |   |   |   |
|--------------------------------------------|---|---|---|---|---|---|
| Flaxman and Bond 2010                      | ? | - | - | - | ? | - |
| Flook et al. 2013                          | ? | - | + | - | ? | - |
| Franco et al. 2010                         | ? | - | + | + | ? | - |
| Grégoire and Lachance 2015                 | - | - | - | - | ? | - |
| Grégoire et al. 2015                       | - | - | - | - | ? | - |
| Hartfield et al. 2011                      | - | - | - | - | ? | - |
| Hartfiel et al. 2012                       | ? | - | - | - | ? | - |
| Hartfiel et al. 2017                       | ? | - | - | - | - | - |
| Huang et al. 2015                          | ? | - | - | - | ? | - |
| Hülsheger et al. 2013                      | ? | ? | - | - | ? | - |
| Hülsheger et al. 2015                      | - | - | - | - | ? | - |
| Ireland et al. 2017                        | ? | - | + | - | ? | - |
| Jennings et al. 2017                       | ? | - | ? | - | ? | - |
| Klatt et al. 2009                          | - | - | - | - | ? | - |
| Klatt et al. 2017                          | ? | - | - | - | ? | - |
| Krick and Felfe 2020                       | ? | - | + | - | ? | - |
| Lacerda et al. 2018                        | ? | - | - | - | ? | - |
| Lebares et al. 2019                        | ? | - | ? | + | + | - |
| Lemaire et al. 2011b                       | ? | - | + | - | ? | - |
| Lilly et al. 2019                          | ? | - | - | - | ? | - |
| Lin et al. 2015                            | - | - | + | - | ? | - |
| Lin et al. 2019                            | ? | - | - | - | ? | - |
| Ludwigs et al. 2019                        | + | - | - | - | ? | - |
| Mackenzie et al. 2006                      | - | - | - | - | ? | - |
| Maddux et al. 2018                         | ? | + | - | - | ? | - |
| Manotas et al. 2014                        | ? | - | - | - | ? | - |
| Masih et al. 2020                          | + | - | + | - | - | - |
| McConachie et al. 2014                     | + | - | ? | - | ? | - |
| Michel et al. 2014; Rexroth et al. 2017    | ? | - | - | - | - | - |
| Mino et al. 2006                           | ? | - | - | - | ? | - |
| Mistretta et al. 2018                      | ? | - | + | - | ? | - |
| Molek-Winiarska and Zolnierczyk-Zreda 2018 | ? | - | + | - | ? | - |
| Möltner et al. 2018                        | ? | - | - | - | ? | - |

|                                                |   |   |   |   |   |   |
|------------------------------------------------|---|---|---|---|---|---|
| Nübold et al. 2019                             | ? | - | + | - | ? | - |
| O'Brien et al. 2019                            | ? | + | - | - | ? | - |
| Pandya 2019                                    | + | - | - | - | ? | - |
| Pang and Ruch 2019                             | ? | - | + | - | ? | - |
| Pipe et al. 2009                               | ? | - | - | - | ? | - |
| Querstret et al. 2017                          | + | - | - | - | ? | - |
| Rao et al. 2017                                | ? | + | + | - | ? | - |
| Riley et al. 2017                              | ? | + | - | - | ? | - |
| Roeser et al. 2013                             | ? | - | - | - | - | - |
| Sakuma et al. 2012                             | + | - | - | - | ? | - |
| Schroeder et al. 2018                          | ? | + | - | - | ? | - |
| Shonin et al. 2014                             | ? | - | - | - | ? | - |
| Singh et al. 2016                              | ? | - | + | - | ? | - |
| Singh et al. 2020                              | ? | - | - | - | ? | - |
| Smith et al. 2020                              | ? | - | - | - | ? | - |
| Sood et al. 2011                               | ? | - | - | - | ? | - |
| Sood et al. 2014                               | + | - | - | - | ? | - |
| Sutarto et al. 2012                            | ? | - | - | - | ? | - |
| Tahamsebi et al. 2018                          | ? | + | - | - | ? | - |
| Taylor et al. 2016                             | - | - | + | - | - | - |
| Telles et al. 2012                             | - | ? | + | - | ? | - |
| Valley and Stallones 2017                      | ? | - | - | - | ? | - |
| van Berkel et al. 2014; van Dongen et al. 2016 | + | - | - | - | - | - |
| Versluis et al. 2018                           | ? | - | - | - | ? | - |
| Watanabe et al. 2019                           | ? | - | + | - | + | - |
| Wolever et al. 2012                            | ? | - | - | - | ? | - |
| Yang et al. 2018                               | ? | - | + | - | ? | - |
| Zolnierczyk-Zreda et al. 2016                  | + | - | - | - | ? | - |

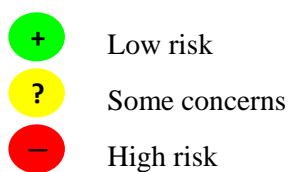

---
